# Supplementary material for: Molecular profiling and combinatorial activity of CCT068127: a potent CDK2 and CDK9 inhibitor
Source: PubMed Central journal article supplement (PMC5830651; doi:10.1002/1878-0261.12148), 2018-01-28
Supplement: MOL2-12-287-s002.pdf [file MOL2-12-287-s002.pdf]

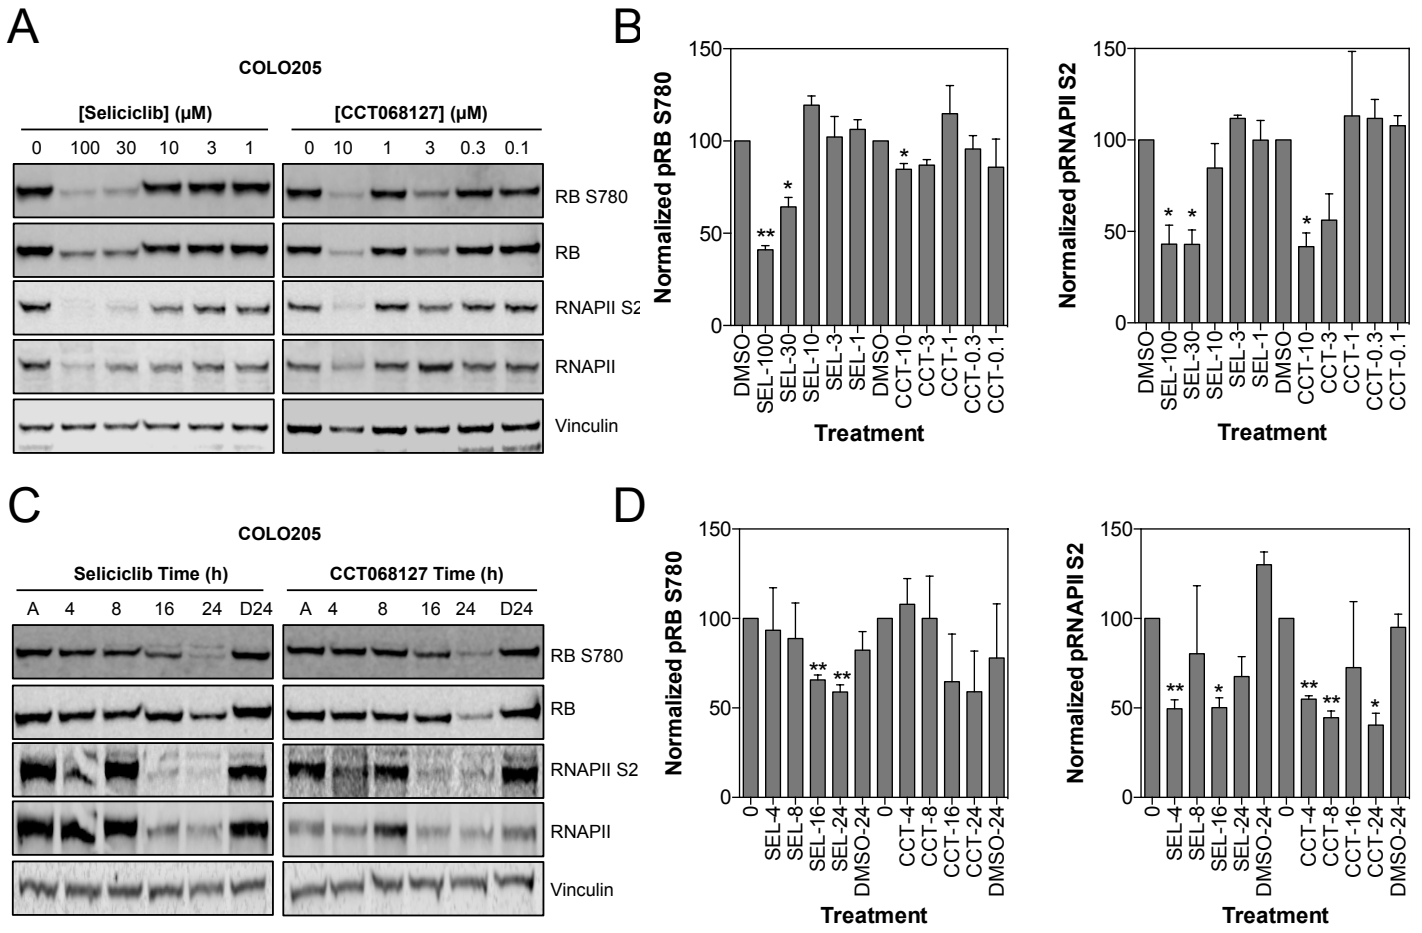

Supplementary Figure 2. Whittaker et al.
