# Supplementary material for: Molecular profiling and combinatorial activity of CCT068127: a potent CDK2 and CDK9 inhibitor
Source: PubMed Central journal article supplement (PMC5830651; doi:10.1002/1878-0261.12148), 2018-01-28

**A**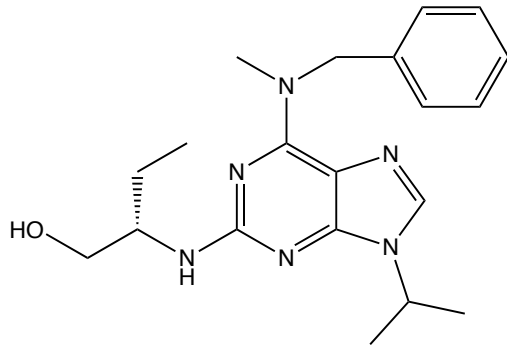**CCT068152****B**

| Kinase  | IC <sub>50</sub> (μmol/L) |
|---------|---------------------------|
| CDK1/B1 | >200                      |
| CDK2/E  | >50                       |
| CDK4/D1 | >200                      |
| CDK7/H  | >200                      |
| ERK2    | >200                      |

**C**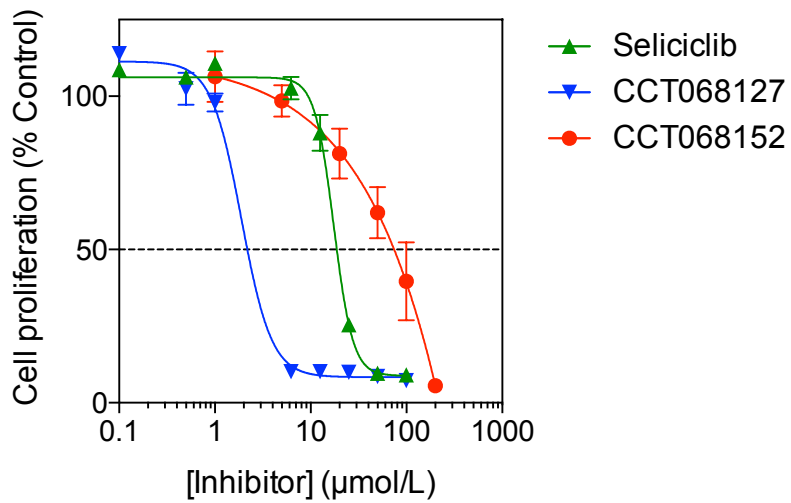**D**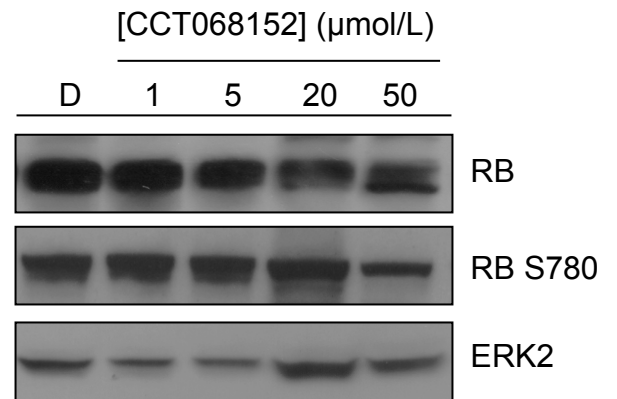

Supplement: MOL2-12-287-s005.pdf [file MOL2-12-287-s005.pdf]
